# Supplementary material for: TiO2(B) nanofiber bundles as a high performance anode for a Li-ion battery
Source: Royal Society of Chemistry journal article supplement (doi:10.1039/c2ra23336c), 2012-12-22
Supplement: c2ra23336c.pdf [file c2ra23336c.pdf]

## *Supporting Information*

### **TiO<sub>2</sub> (B) Nanofiber Bundles as a High Performance Anode for Li-Ion Battery**

*Ziyang Guo, Xiaoli Dong, Dandan Zhou, Yonggang Wang\*, Yongyao Xia\**

*Department of Chemistry and Shanghai Key Laboratory of Molecular Catalysis and Innovative Materials, Institute of New Energy, Fudan University, Shanghai 200433, China.*

---

\* Corresponding author. Tel & Fax: 0086-21-51630318  
E-mail address: [ygwang@fudan.edu.cn](mailto:ygwang@fudan.edu.cn) ; [yyxia@fudan.edu.cn](mailto:yyxia@fudan.edu.cn)

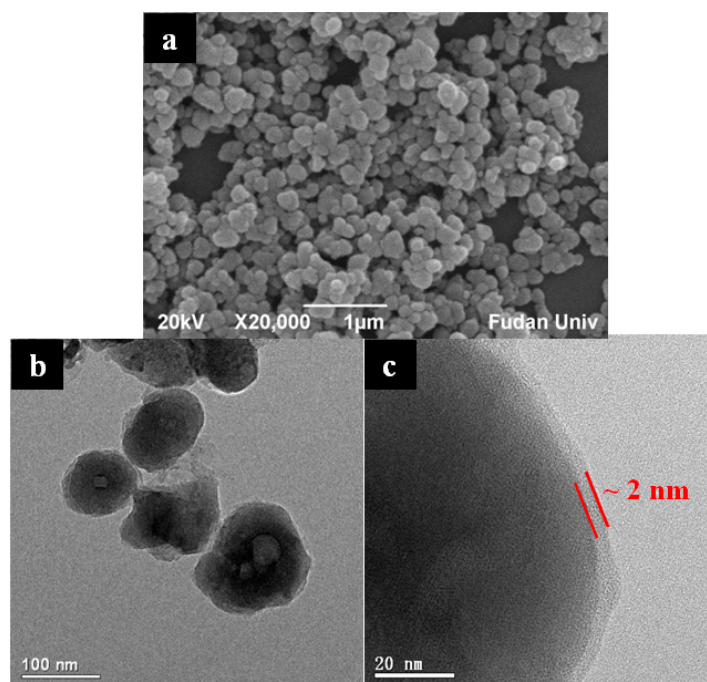

**Figure S1** SEM (a) and TEM (b, c) images of the  $\text{LiFePO}_4$  which were used for  $\text{TiO}_2(\text{B})/\text{LiFePO}_4$  and  $\text{Li}_4\text{Ti}_5\text{O}_{12}/\text{LiFePO}_4$  batteries investigation. The  $\text{LiFePO}_4$  sample was prepared according to Wang *et al.*'s previous report [Y. G. Wang *et al.* *Angew. Chem. Int. Ed.* 2008, 47, 7461].

As shown in Fig.S1a and S1b, the particle-size of the as-prepared  $\text{LiFePO}_4$  is about 80 ~ 100 nm. It can be detected from the HRTEM image (Fig. S1c) that the  $\text{LiFePO}_4$  particle is coated by a carbon layer.

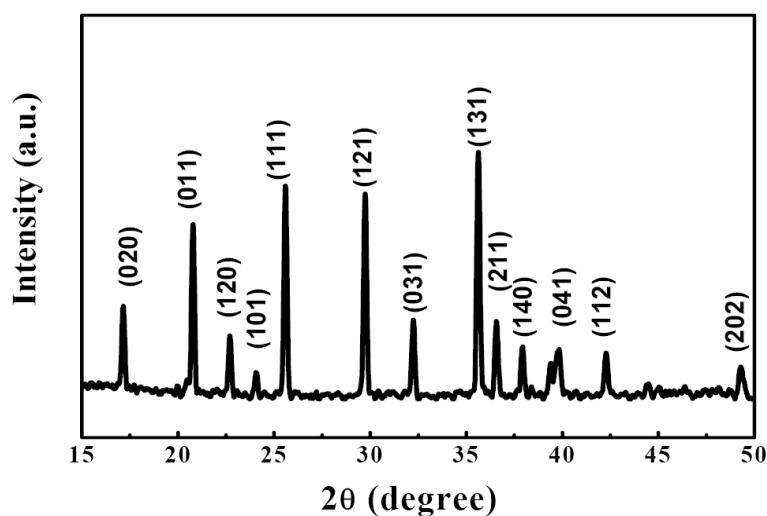

**Figure S2** XRD pattern of as-prepared  $\text{LiFePO}_4$  sample. As shown in Fig. S2, all of the diffraction peaks can be indexed on the basis of an olive  $\text{LiFePO}_4$ .

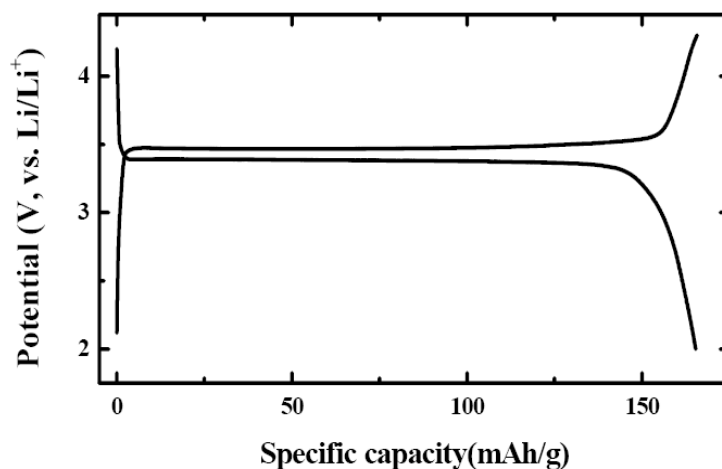

**Figure S3** charge/discharge curves of as-prepared  $\text{LiFePO}_4$  sample with a current density of  $10 \text{ mA g}^{-1}$ . It can be observed from Fig.S3 that the  $\text{LiFePO}_4$  sample displays a reversible capacity about  $163 \text{ mA g}^{-1}$ .

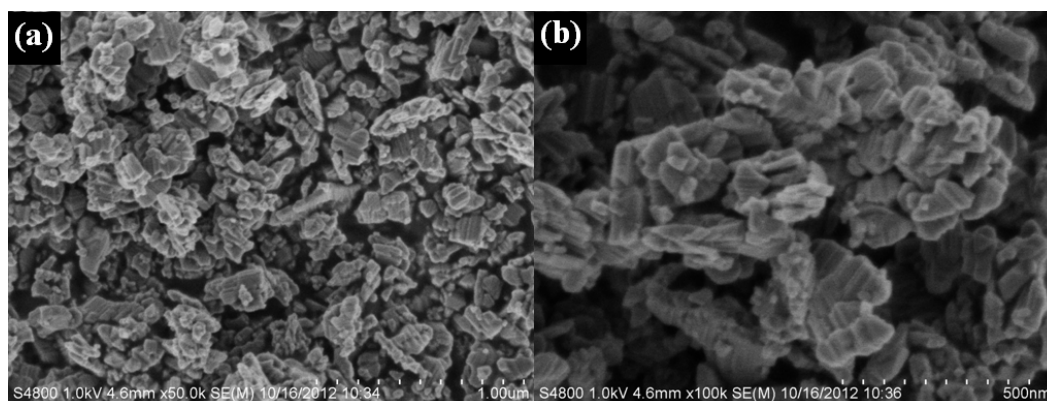

**Figure S4** SEM images of the applied  $\text{Li}_4\text{Ti}_5\text{O}_{12}$  which was used for the  $\text{Li}_4\text{Ti}_5\text{O}_{12}/\text{LiFePO}_4$  battery investigation. This sample is provided by Superhoo Technology Co., Ltd (China). As shown Fig.S4, the typical size of the  $\text{Li}_4\text{Ti}_5\text{O}_{12}$  is 100-200 nm.

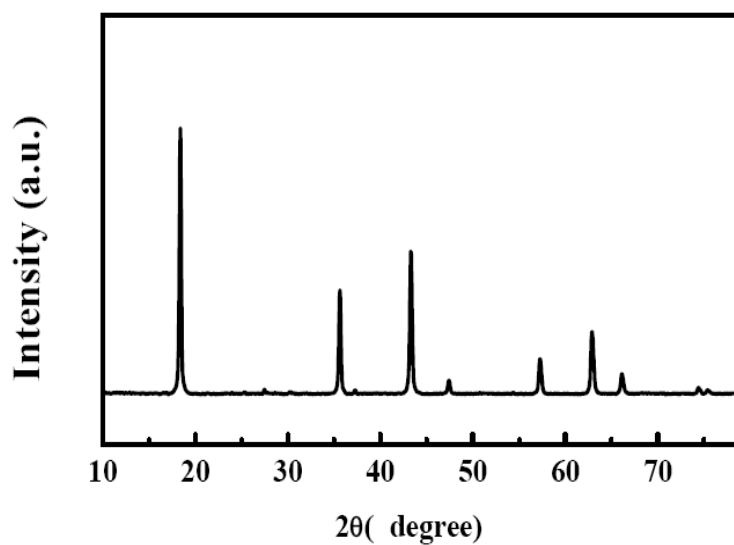

**Figure S5** XRD pattern of the  $\text{Li}_4\text{Ti}_5\text{O}_{12}$  sample, where all of the diffraction peaks can be indexed on the basis of a spinel  $\text{Li}_4\text{Ti}_5\text{O}_{12}$ .
